# Supplementary material
Source: bioRxiv or medRxiv preprint supplement (https://www.biorxiv.org/highwire/filestream/7378/field_highwire_adjunct_files/0/027649-1.pdf)
Supplement: Supplementary file [file 027649-1.pdf]

**1 SUPPORTING TEXT.****2 Inference of gains and presence of genes on branches of the tree.**

3 To estimate the probability that specific genes were gained or present on each branch of the tree,  
4 we chose a simple heuristic, based on the joint probability of the states of the ancestor and  
5 descendant nodes (Methods). We chose this approach because we are not concerned with *any*  
6 gain, but rather with gains that are retained until the end of a branch. For example, any gain at all  
7 is to be expected at some rate more or less without regard to genome content of the host, due to  
8 phage infection or DNA in the environment. However, given that the vast majority of these gains  
9 are followed closely by losses (Baltrus 2013), they are not as biologically interesting as genes  
10 gained and retained adaptively, and they are also mostly unobserved. Additionally, our approach  
11 allows us to consider the probability of steady presence across a branch. Furthermore, our  
12 approach considers the average reconstruction at each node to compute the probability of gain or  
13 presence of genes on branches, rather than summing across each possible reconstructed scenario  
14 in the stochastic mapping procedure (for instance weighted by the likelihood of each possible  
15 scenario). While using all possible mappings could, in principle, reduce the numerical error of  
16 our probability estimates, it would entail an onerous and potentially intractable computation.  
17 Moreover, the biological (Figure 2) and statistical (Figures 5, S8) validations we have performed  
18 suggest that our results are robust.

19 Our method of inferring gains is also different from the probabilities of gains (or,  
20 similarly, the expected number of gains) that are computed by the *gainLoss* software (Cohen and  
21 Pupko 2010), using a previously-developed continuous-time Markov chain (CTMC) model to  
22 count the number of gains on each branch (Minin and Suchard 2008). These models solve the  
23 problem of counting the number of one-way transitions between two states (say, presence and  
24 absence) given transition rates, states at the start and end of the interval, and a set amount of time  
25 in the interval. Thus, the CTMC implemented in *gainLoss* is capable of estimating the expected  
26 number of gains of a given gene on a given branch, with knowledge of gain and loss rates.  
27 However, this approach can lead to problematic cases in which a gene can be absent in ancestor  
28 and descendant nodes, and yet, given a very long branch, is inferred to be gained on this branch.  
29 While such scenarios may have statistical support, in practice they are very hard to interpret and  
30 compare to other events that more obviously support a gain. Given the presence of Archaea in  
31 our phylogeny, which are a dramatically divergent outgroup, this was a cause for concern.

1 Indeed, the CTMC estimated that the median gene was gained more than twice along the long  
2 branch connecting Archaea to Bacteria, with some genes gained more than 10 times on this  
3 branch alone (data not shown). This result is almost certainly artefactual, but has the potential to  
4 substantially skew the overall appraisal of gains for a given gene. This problem is probably  
5 exacerbated by overfitting, given that *gainLoss* assigns each gene a potentially unique mixture of  
6 gain and loss rates, in addition to re-estimating the branch lengths of the tree. All of these  
7 parameters are used in computing an expected number of gains for a gene on a branch in addition  
8 to the reconstruction. It is possible that such methods are inappropriate for large phylogenies  
9 with highly heterogeneous branch lengths. For these reasons and those stated above, we chose to  
10 ignore the *gainLoss* CTMC estimates in favor of the less sophisticated but more interpretable  
11 gain/presence inference method described above.

12

### 13 **Simulation of gene gain/loss evolution.**

14 Previous attempts to use the *gainLoss* software to make inferences about horizontal gene transfer  
15 and detect coevolution used a parametric bootstrapping approach, simulating the evolution of  
16 genes to obtain null expectations for testing hypotheses (Cohen et al. 2011, 2012). While the use  
17 of exact parametric methods to estimate this null distribution is possible in principle (Maddison  
18 1990), these methods rely upon a single binary reconstruction of ancestral states. Clearly, our  
19 probabilistic reconstruction is unsuited for such an analysis. Again, one could in principle  
20 enumerate all possible reconstructions, and estimate the null distribution exactly as a weighted  
21 sum across each reconstructions, but developing this method for large trees lies outside the scope  
22 of this paper.

23 In our simulations, we therefore followed the example of others with certain  
24 modifications. The simulation procedure implemented in the *gainLoss* program was too memory-  
25 intensive to be feasible for a sufficiently large number of genes. Consequently, we took the gain  
26 and loss rates inferred by *gainLoss* for the real genes and used their distribution to simulate the  
27 evolution of genes using the function *rTraitDisc()* in the APE library. Briefly, we fit gamma  
28 distributions to the rates of gain and the rates of loss across all genes, and used the resulting  
29 parameters to define sampling distributions for gain and loss rates of simulated genes (see  
30 Methods). We found that using these distributions inferred relatively few gains compared to the  
31 gains of observed genes (compare Figure S1A and Fig S1C). We speculated that the rate mixture

1 model employed by *gainLoss* has difficulties accommodating the upper tail of the distribution of  
2 gain rates (roughly, those genes gained >50 times in this tree), given that the vast majority of  
3 genes are gained relatively few times (Fig S1A). Consequently, we adjusted the shape  
4 parameters of the gain and loss rate distributions heuristically to find values that gave  
5 distributions of simulated gains that included genes that are gained sufficiently many times. We  
6 found that multiplying the shape parameter of the gain rate by 3 and the shape parameter of the  
7 loss rate by 1.5 gave reasonably wide distributions of gains among simulated genes (Fig S1E). It  
8 is important to note that the shape of the distribution from which rates are drawn does not affect  
9 the simulated evolution of a given gene with single sampled gain and loss rates. Furthermore,  
10 because we are not using the entire distribution of simulated genes but only those most  
11 appropriate to each gene as a null distribution, any differences in the distributions of gain counts  
12 between simulated and real genes are unlikely to affect results.

13

#### 14 **Power of the PGCE detection method.**

15 One of our observations is that there are weak relationships between the prevalence of a gene,  
16 how often it is gained, and its in- and out-degrees in the PGCE network (Fig S4). Given that  
17 these values define the null distributions that we use to infer PGCEs, it was possible that our  
18 analyses are less sensitive for certain values of these parameters. We considered to what extent a  
19 lack of power was affecting our results with a simple power analysis. For genes  $i$  and  $j$ , the  
20 maximum observable value  $C_{ij}$  counting the gains of  $j$  in the presence of  $i$  is  $\min(p_i, g_j)$ ,  
21 representing respectively the prevalence of gene  $i$  and the number of gains of gene  $j$ . For a range  
22 of values of these parameters  $(p_i, g_j)$ , we compared this maximum potential observation to the  
23 null distribution from parametric bootstrapping appropriate to these parameter values. This  
24 represents the most extreme possible test statistic between the two genes for these parameter  
25 values, so in each case the null hypothesis should be rejected if there is sufficient power. We  
26 found that power varied substantially across various values of  $(p_i, g_j)$  (Figure S2A). Specifically,  
27 we were incapable of detecting associations for any combination involving the most-prevalent  
28 genes or the least-gained genes. This is unsurprising, given that noise is expected to be high for  
29 the former, and signal to be low for the latter. Considering our observed distribution of p-values  
30 (Figure S2B), we find the expected spike in frequency near  $p = 0$  (indicating true positive  
31 dependencies), but also an unexpected spike in frequency near  $p = 1$ , indicating that our

1 parametric bootstrapping test is underpowered due to the sparsity of gains, as suggested by  
2 power analysis (Fig S2A). Consequently, there are likely to be many more PGCEs than we detect  
3 in this study. Notably, if we relax our FDR threshold from 1% to 5% in inferring PGCEs, we  
4 increase the raw number of edges in our network more than ten-fold (from 8,415 to 86,719). We  
5 chose to proceed with the more stringent threshold to focus on the most confident PGCEs, but  
6 we use this example to highlight the very large potential for PGCEs structuring genome  
7 evolution in prokaryotes.

8

### 9 **Processing and analysis of the PGCE network.**

10 After inferring a PGCE network, we post-processed this network to both ease further analysis  
11 and to remove potentially spurious edges. First, we removed edges such that the network became  
12 a directed acyclic graph (DAG). DAGs are relatively easy to analyze and interpret topologically.  
13 We found only one cycle-inducing edge: an obviously spurious self-edge (for gene K07218). The  
14 absence of non-spurious cycles may be initially surprising, but can be explained by the relatively  
15 small number of genes with in-edges (less than one-third of genes in the network) and the anti-  
16 correlation of in-degree and out-degree across genes (Fig S4E). To evaluate whether the lack of  
17 cycles is attributable to degree distribution, we randomly rewired the DAG five times while  
18 preserving degree distribution, and in each of these five cases the result was still a DAG. This  
19 analysis indicates that this acyclic topology is a simple consequence of degree distribution, rather  
20 than a biological property of specific PGCE relationships. Together, these results indicate that  
21 few cycles are expected for a network with such properties. However, one might still expect  
22 some number of true cycles from a biological point of view, even if the network itself is biased  
23 against them. We believe that such cycles likely exist, but we are not detecting them because of  
24 our relatively low power, and the stringency of our threshold for assigning edges (Fig S2, see  
25 above section).

26 Next, we removed potentially spurious edges in the network that might have been  
27 introduced by indirect transitive effects. For example, if gene A encourages the gain of gene B,  
28 and gene B encourages the gain of gene C ( $A \rightarrow B \rightarrow C$ ), we might also infer that there is a direct  
29  $A \rightarrow C$  PGCE, even if such a PGCE does not actually exist. Consequently, we performed a  
30 transitive reduction of our DAG to obtain a “minimal equivalent graph” (Hsu 1975), or a DAG  
31 with all potentially indirect interactions (such as the  $A \rightarrow C$  example above) removed. While

1 potentially removing true PGCEs, we thus enrich our PGCE network for the most confident  
2 interactions. This procedure removed 186 potentially indirect PGCEs. It is this DAG, with all  
3 cycles and indirect edges removed, that we used for all downstream analyses.

4 The degree distributions for this network indicated that a slight majority of genes (nodes)  
5 are disconnected, and we omitted these genes from further analyses. Furthermore, the  
6 distribution of in-degrees was more unequal than that of out-degrees across nodes (Fig S4A,  
7 S4B). The degree distributions showed weak relationships with the prevalence and gain count of  
8 genes, but these do not appear to be primary determinants of network structure (Fig S4C, S4D).

9

### 10 **Dependencies among pathways.**

11 The *urtA-rbsL* PGCE (Figure 3) highlighted the potential importance of inter-pathway PGCE  
12 dependencies. To understand the structure of such pathway-pathway dependencies, we tested for  
13 associations between genetic pathways within the PGCE network, compared to a null  
14 distribution of rewired networks. We detected 93 pathway-pathway dependencies (each  $p <$   
15  $0.001$ , compared to the rewired null distribution), which we modeled as a directed network  
16 among 65 pathways (Figure S6). Unlike the PGCE network, the pathway-pathway dependency  
17 network has many cycles. Related pathways showed many dependencies and clustered with each  
18 other, most strikingly for the metabolism of aromatic compounds. Consequently, we expect that  
19 PGCE dependencies, rather than only representing one-to-one interactions between genes, also  
20 reflect functional relationships between whole genetic pathways.

21

### 22 **Algorithms.**

23 *Feedback arc set (FAS) identification algorithm* (Hausmann and Korte 1978; Hassin and  
24 Rubinstein 1994).

- 25 1) Start with an empty DAG and an empty FAS;
- 26 2) Select a random edge  $E$  from our PGCE network, add it to the DAG;
- 27 3) If adding  $E$  to the graph adds a cycle, remove  $E$  again and add it to the FAS, else accept  $E$   
28 in the DAG;
- 29 4) If there are more edges that are neither in the DAG nor in the FAS, go to 2

30 *Transitive reduction of a DAG algorithm* (Hsu 1975).

- 31 1) Convert the network into an adjacency matrix representation;

- 1        2) Convert the adjacency matrix into a path matrix;
- 2        3) Remove all edges in the path matrix that can be explained by other paths, by iterating
- 3            over all groups of 3 nodes.

4 *Topological sort with grouping algorithm* (Knuth 1973).

5 We used the following procedure to perform a topological sort of a DAG:

- 6        (1) Initialize the rank count with “rank” = 1;
- 7        (2) Identify the set of nodes in the DAG with in-degree = 0 (these occupy the first position in
- 8            a sort);
- 9        (3) Label these nodes with the current “rank” (1 in the first step);
- 10       (4) Remove these nodes and their edges from the DAG (some new nodes will now have in-
- 11            degree = 0;
- 12       (5) if there are still nodes in the DAG, increment “rank” by 1 and go to step 2.

13 The resulting labeled groups constitute the ordered ranks of the topological sort.

14

15

16

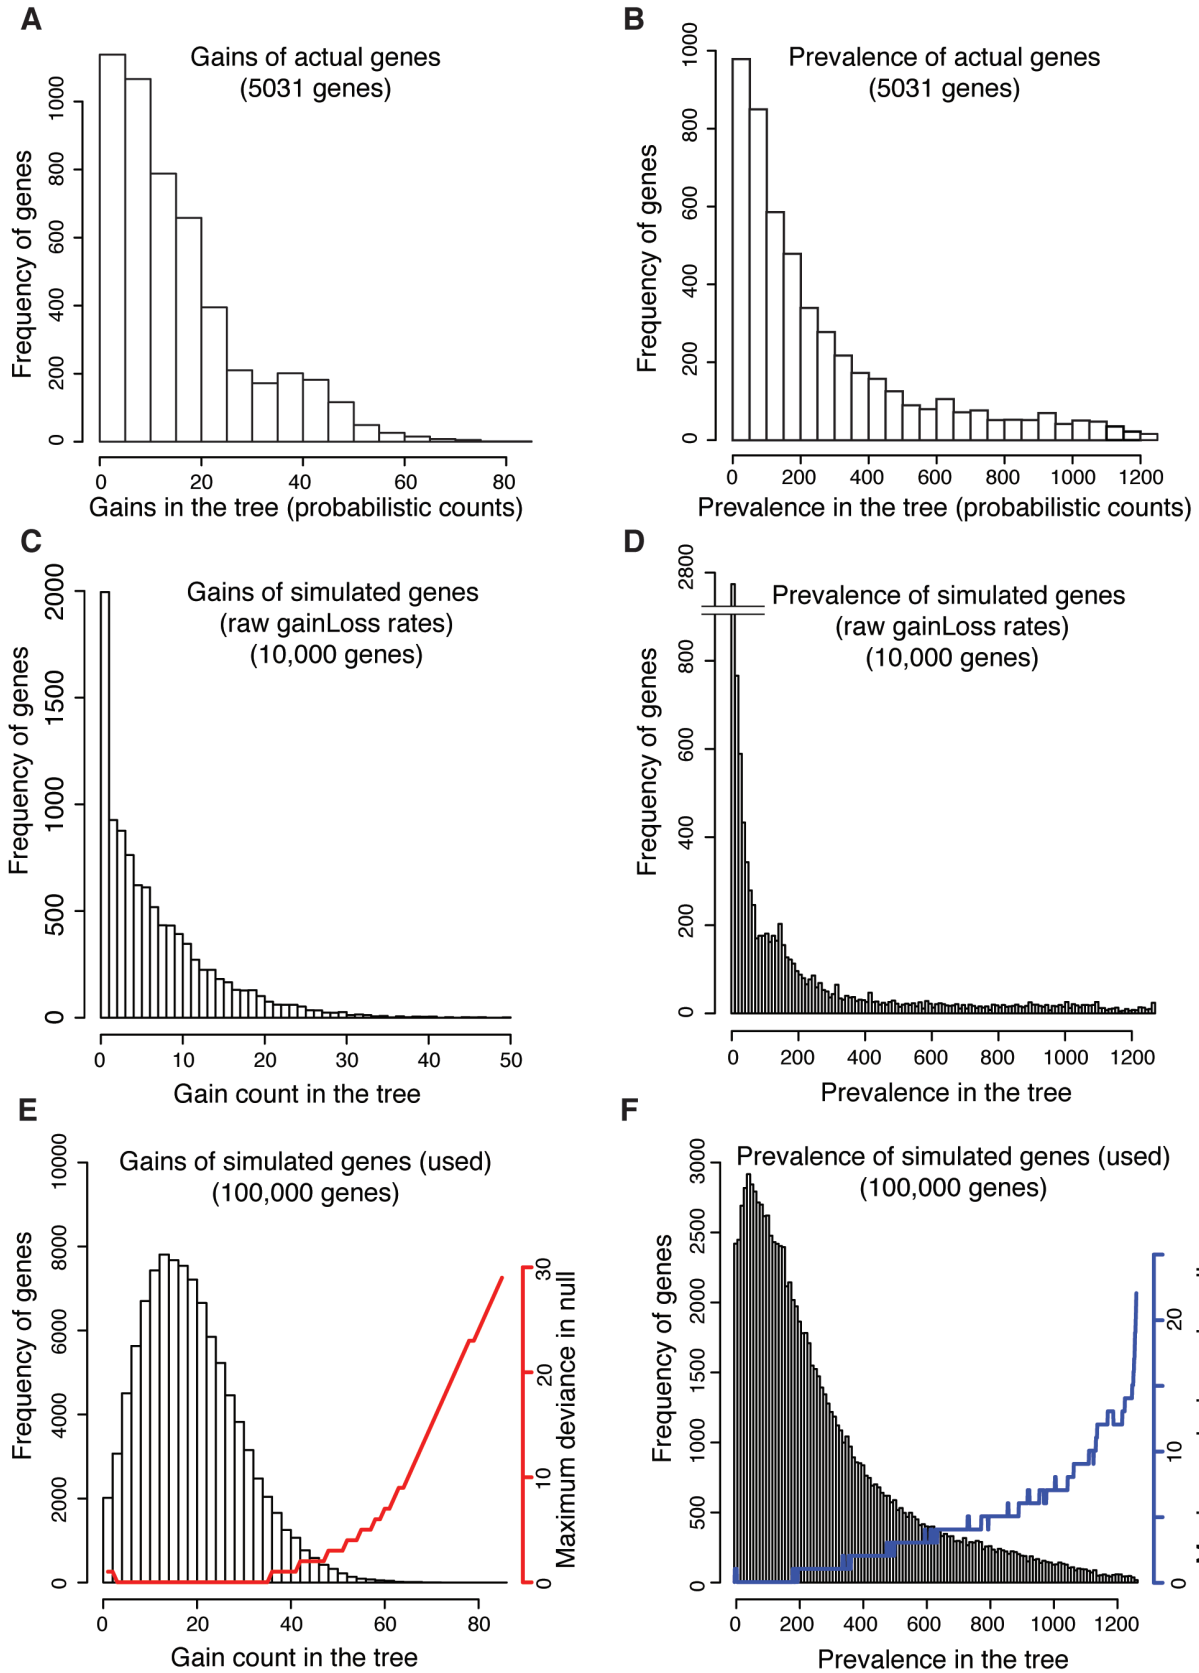

1 **Figure S1.** Distributions of total gains (A) and prevalence (B) estimated for empirical genes by  
2 the *gainLoss* program. *gainLoss* rate estimates lead to underestimation of gains (C) and  
3 prevalence (D) in the tree: gene gain counts across  $10^4$  genes simulated according to gain/loss  
4 rates directly estimated by *gainLoss* for empirical genes. Gene gain (E) and prevalence (F)  
5 counts across genes simulated for use in null distributions. Red (gain) and blue (prevalence) line  
6 plots indicate, for each value of gain count or prevalence, the absolute difference of the least  
7 similar gene in its null distribution from that value (maximum deviance). For instance, in (E), a  
8 gene with 40 gains will be compared to a null distribution of simulated genes with as few as 39  
9 gains and as many as 41 gains (deviance of one). Relative to (A) and (B), parameters of the  
10 underlying distributions of gain and loss rates were heuristically adjusted to provide acceptable  
11 coverage of the gain/prevalence values observed for empirical genes in (E) and (F).  
12



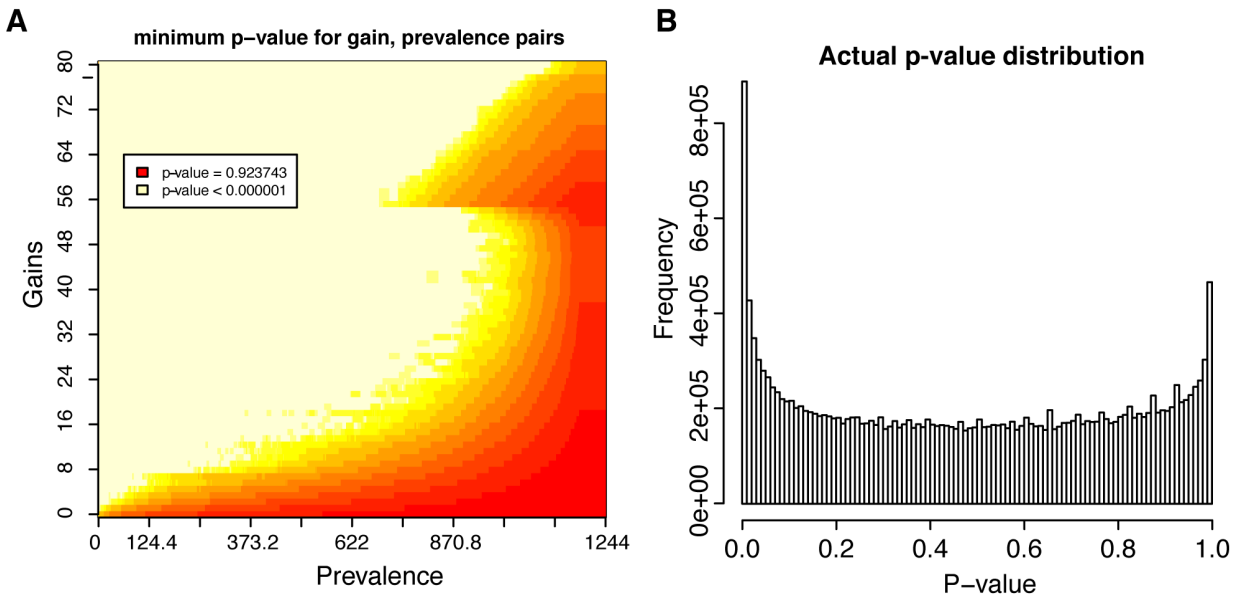

1  
 2 **Figure S2.** (A) Power analysis of the parametric bootstrapping hypothesis test for detecting  
 3 PGCEs. X and Y axes represent, respectively, total prevalence and total gains for a hypothetical  
 4 pair of genes with a strong PGCE (maximum observable test statistic). Colors represent the  
 5 (log10-scaled) minimum possible p-value that can be attained for such a gene pair using the  
 6 relevant null distribution of simulated genes. Areas that are not white/pale yellow are  
 7 underpowered for detecting PGCEs. (B) The distribution of empirical p-values observed for  
 8 testing hypotheses of no PGCE in the evolution of pairs of genes, according to parametric  
 9 bootstrapping. The spike at  $p = 1.0$  in (B) indicates that sparsity in the data detracts from power,  
 10 as predicted in (A), even after filtering pairs of genes with  $C_{ij} \leq 1$ .

11  
 12

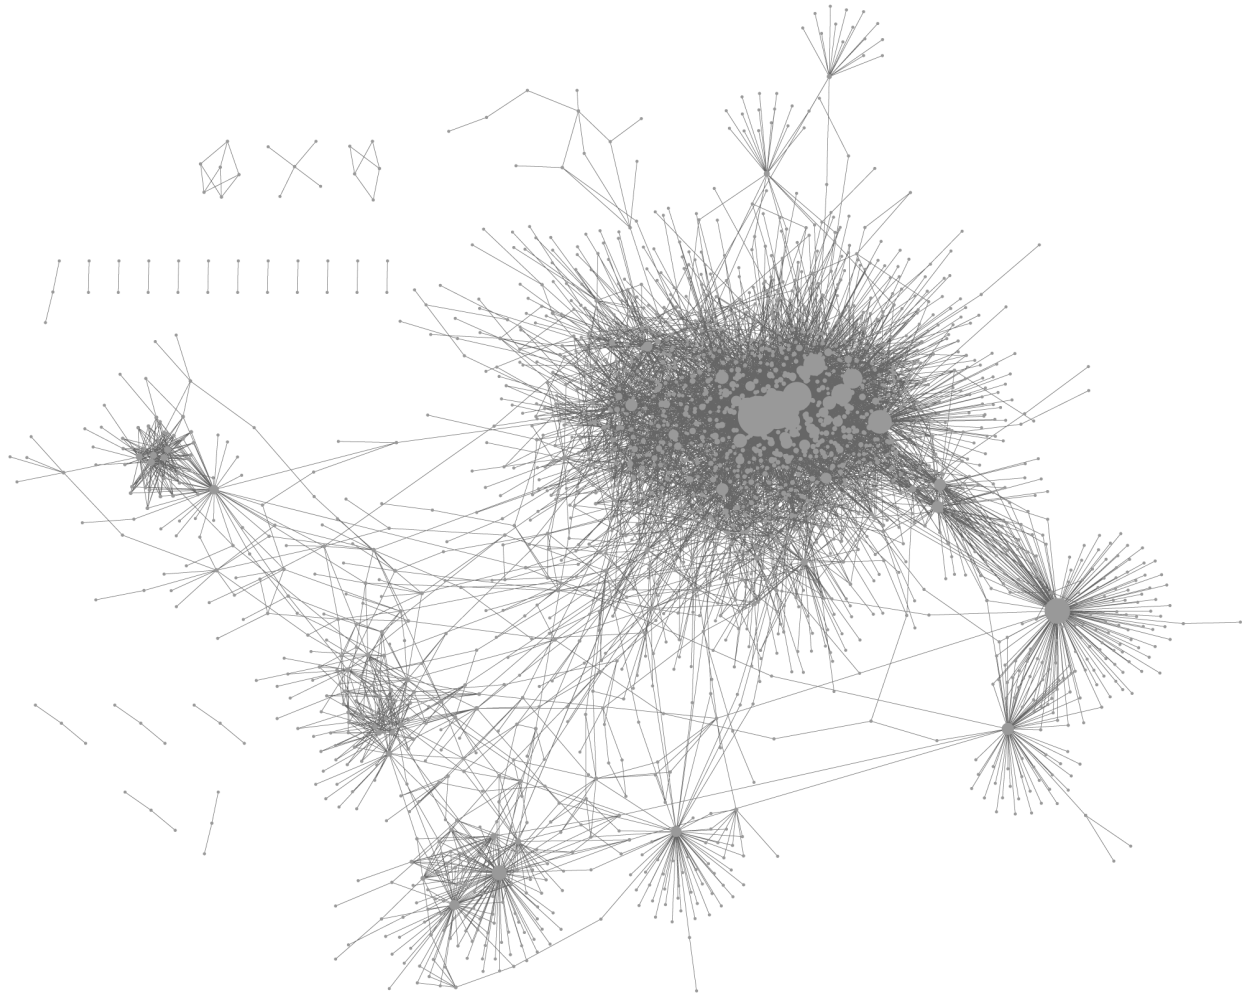

1  
2 **Figure S3.** A global network of directional dependencies between prokaryotic genes (PGCEs).  
3 Node size is scaled to total edge count for each node (and see also Figure S4).  
4  
5

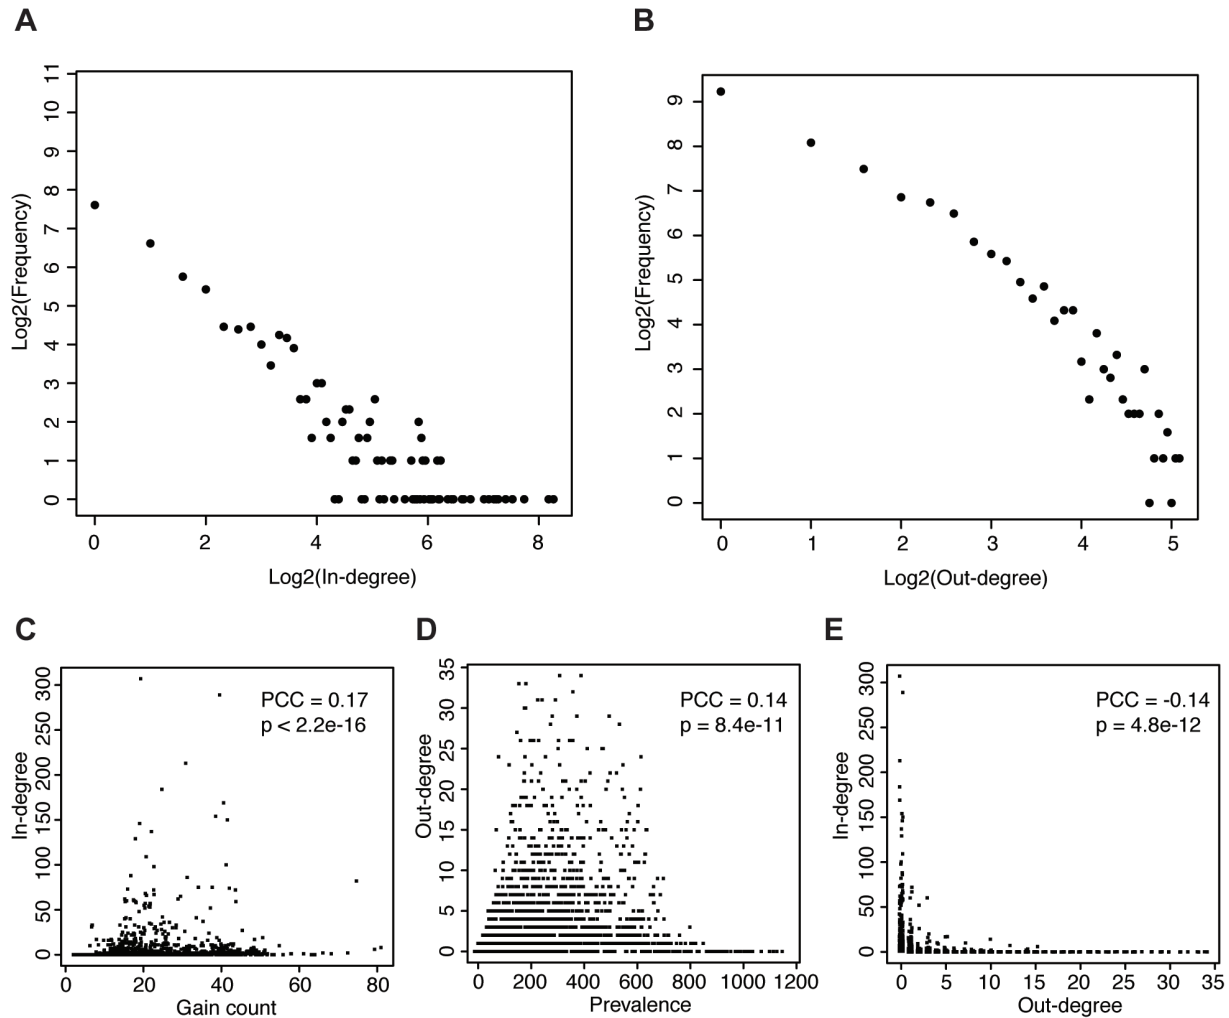

1  
 2 Figure S4. (A) Out-degree distributions of the final PGCE network (nodes with out-degree equal  
 3 to zero are omitted). (B) In-degree distributions of the final PGCE network (nodes with in-degree  
 4 equal to zero are omitted). (C-E): Prevalence and gain counts of genes only weakly affect their  
 5 PGCEs. The degrees of each gene (node) in the PGCE network are plotted against its prevalence  
 6 (C) and counted gains (D) throughout the tree, and the degrees are plotted against each other (E).  
 7 Pearson correlations between the plotted variables are indicated above each plot. PCC = Pearson  
 8 correlation coefficient, p-value is from a correlation test.

9  
 10  
 11

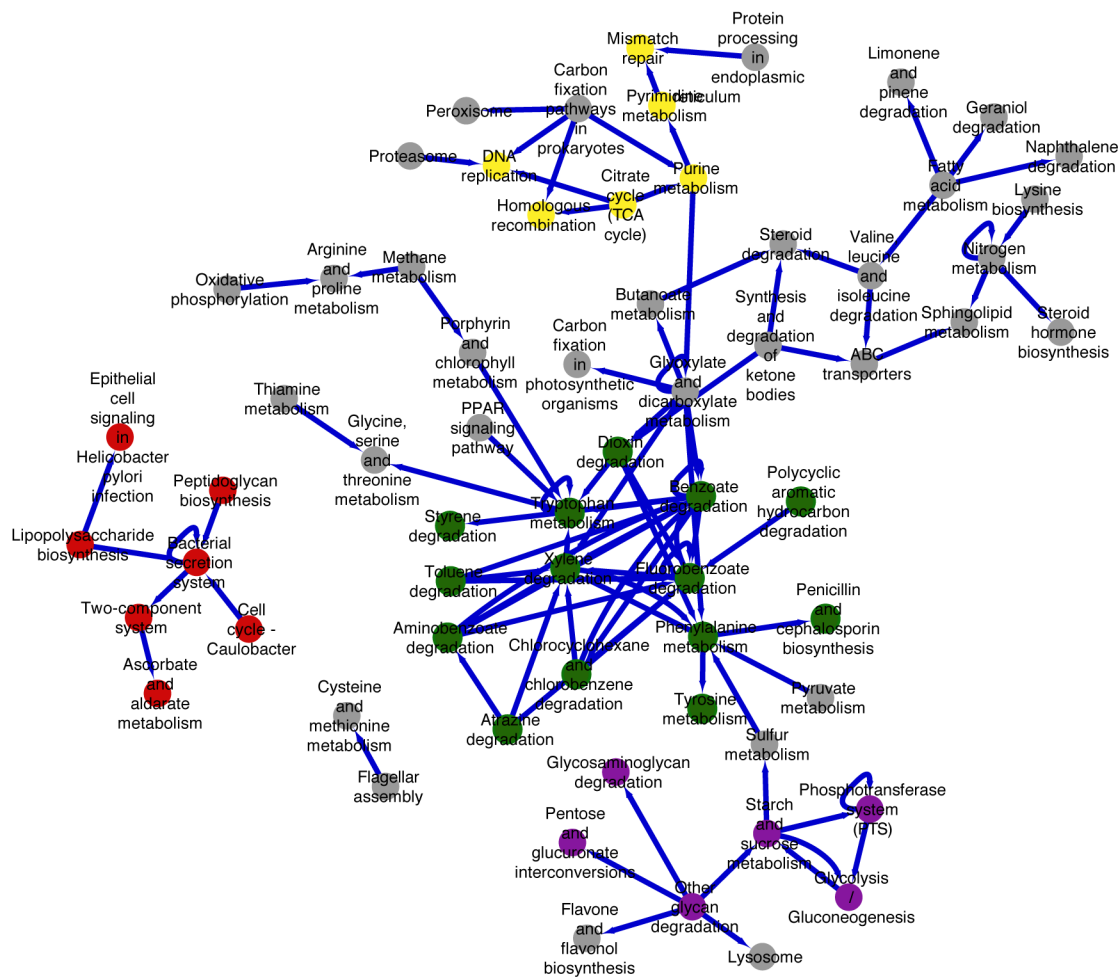

1  
 2 Figure S5. A network of evolutionary dependencies between functional pathways. Overall  
 3 structure of the evolutionary pathway-pathway dependency network. Directed edges indicate that  
 4 the source pathway and the sink pathway are connected by more PGCEs between individual  
 5 genes in those pathways than expected from a rewired null distribution ( $p < 0.001$ ). Colors  
 6 indicate selected pathway clusters of similar functions (green: aromatic compound secondary  
 7 metabolism; red: pathogenesis; purple: carbohydrate metabolism; yellow: DNA metabolism).

8  
 9  
 10

A

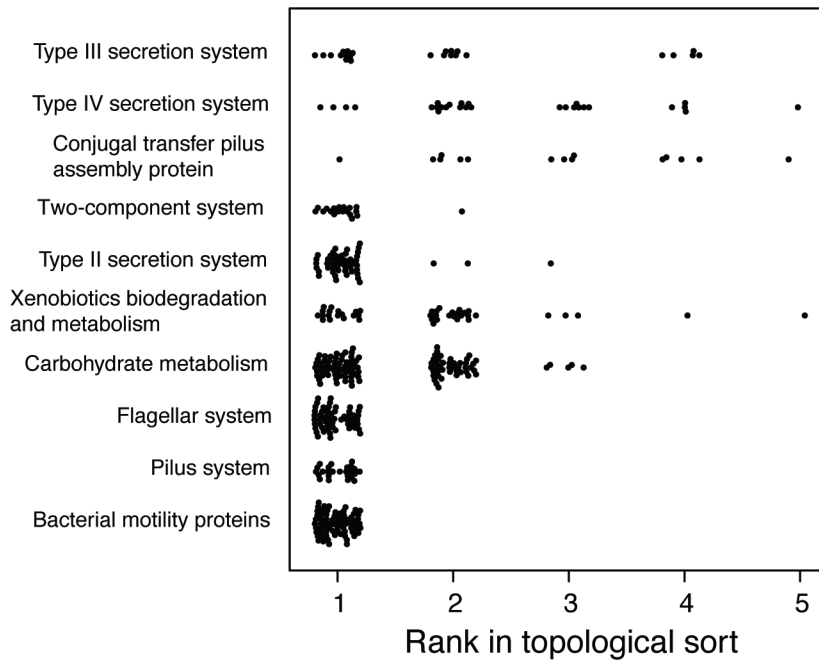

B

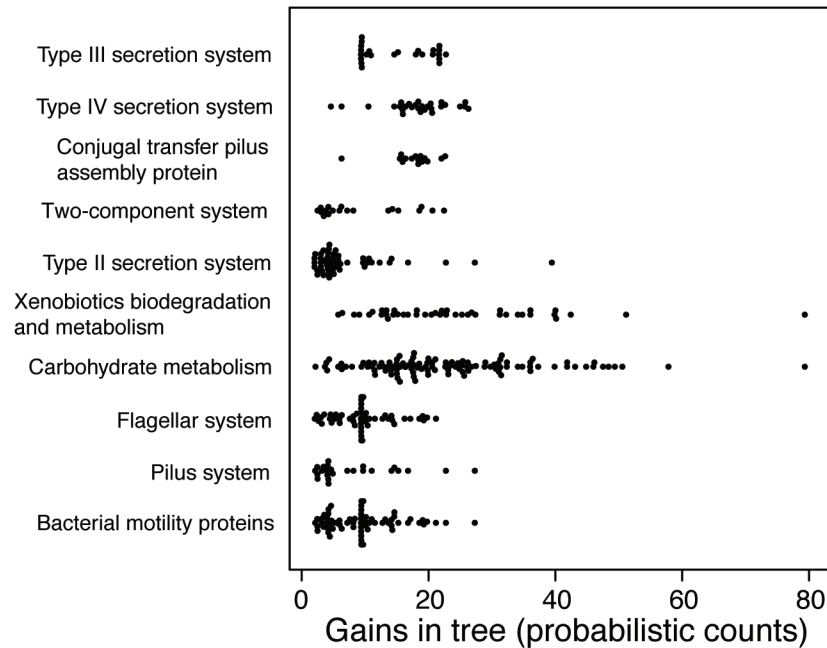

1  
 2 **Figure S6. Differences in gain counts do not explain differential sorting of genes in different**  
 3 **functional groups.** (A): Variation in ranks of the sort across functional categories. (B): Total  
 4 branches in which gains have occurred (“gains in tree”) across genes in various functional  
 5 categories that are differentially ranked in a topological sort of the PGCE network. Note that the  
 6 categories with the highest average gain (Carbohydrate and Xenobiotics metabolism) are ranked  
 7 in the middle of the sort. See Table 1.  
 8

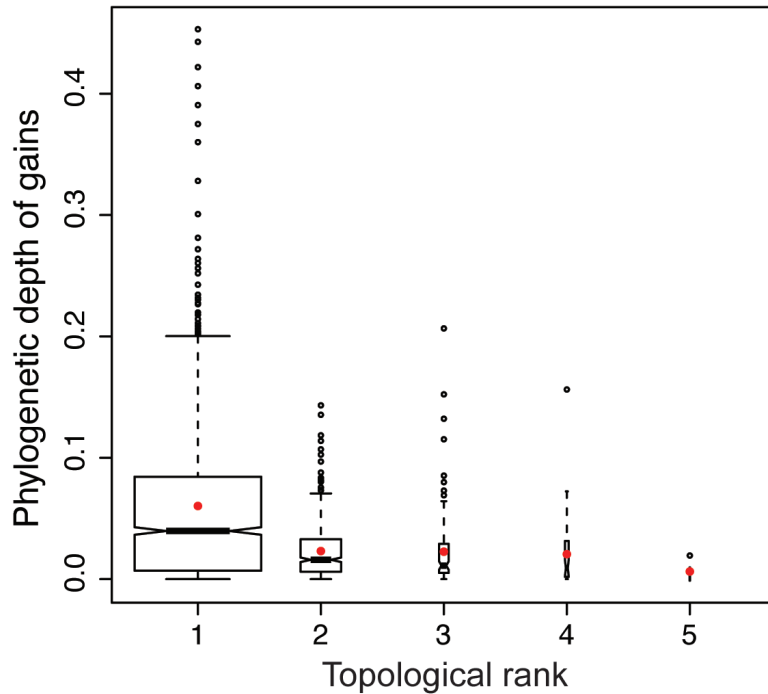

1  
2 Figure S7. Phylogenetic depth of gene gains in bacteria decreases with rank in the topological  
3 sort. Phylogenetic depth of the gains of genes are weakly negatively correlated with their ranks  
4 in the sort (Spearman's  $r = -0.24$ ,  $p < 2.2 \times 10^{-16}$ ). For each rank, we plot the distribution of the  
5 phylogenetic depths (distance of gain branch from root) of the average depth of confident gains  
6 ( $\text{Pr}(\text{gain}) > 0.6$ ) of each gene in that rank. The mean of each distribution is plotted as a red point.  
7 Branches leading to Archaea and archaeal genomes are omitted from the analysis. Boxplot  
8 widths are scaled to the number of genes in each rank of the sort. The tree was converted to an  
9 ultrametric tree for the purpose of this analysis (the root is separated from all tips by a total  
10 branch length of 1.0).

11  
12

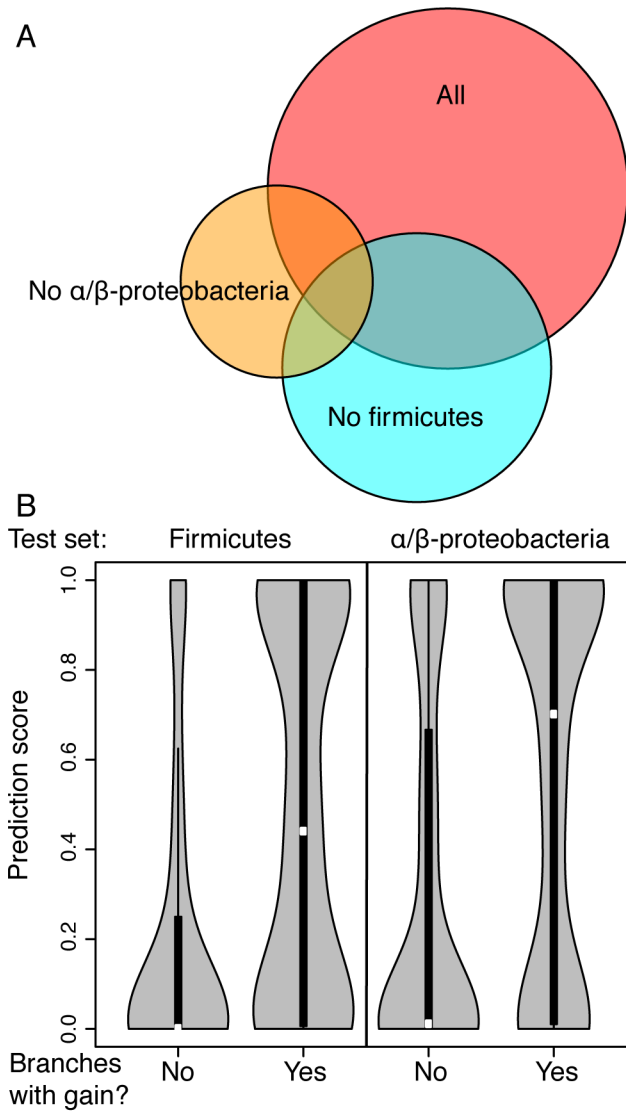

1  
 2 Figure S8. (A) Overlap of edges in PGCE networks inferred from different subsets of the data.  
 3 See also Table S4. All overlaps are highly statistically significant ( $p < 2.2E-16$ , hypergeometric  
 4 test). (B) Distribution of prediction scores for gene acquisition on each branch in the test set  
 5 clades. Branches with a gain ( $\text{Pr}(\text{gain}) > 0.5$ ) have a higher score than branches without a gain  
 6 ( $\text{Pr}(\text{gain}) < 0.5$ ) for predictable genes ( $p < 2.2E-16$  for each, U-test). Predictable genes are the  
 7 affected genes in at least one PGCE, i.e. they have at least one in-edge in the trained PGCE  
 8 model. Violin plots show density of each distribution, with an inset boxplot (white box is median  
 9 of distribution). Each violin plot shows the distribution of prediction scores for branches in one  
 10 test set for one category (gene gained/gene not gained).

1 **Table S1.** Genes which influence the gain of *rbsS*, gene encoding the RuBisCO small chain.

| KEGG Orthology (KO) | Description                                                                                                                                          |
|---------------------|------------------------------------------------------------------------------------------------------------------------------------------------------|
| K02584              | Nif-specific regulatory protein                                                                                                                      |
| K06139              | pyrroloquinoline quinone biosynthesis protein E                                                                                                      |
| K06138              | pyrroloquinoline quinone biosynthesis protein D                                                                                                      |
| K06137              | pyrroloquinoline-quinone synthase [EC:1.3.3.11]                                                                                                      |
| K06136              | pyrroloquinoline quinone biosynthesis protein B                                                                                                      |
| K09165              | hypothetical protein                                                                                                                                 |
| K03809              | Trp repressor binding protein                                                                                                                        |
| K13483              | xanthine dehydrogenase YagT iron-sulfur-binding subunit                                                                                              |
| K13481              | xanthine dehydrogenase small subunit [EC:1.17.1.4]                                                                                                   |
| K02448              | nitric oxide reductase NorD protein                                                                                                                  |
| K02597              | nitrogen fixation protein NifZ                                                                                                                       |
| K02596              | nitrogen fixation protein NifX                                                                                                                       |
| K02595              | nitrogenase-stabilizing/protective protein                                                                                                           |
| K02593              | nitrogen fixation protein NifT                                                                                                                       |
| K02592              | nitrogenase molybdenum-iron protein NifN                                                                                                             |
| K02022              | HlyD family secretion protein                                                                                                                        |
| K11811              | arsenical resistance protein ArsH                                                                                                                    |
| K08973              | putative membrane protein                                                                                                                            |
| K12511              | tight adherence protein C                                                                                                                            |
| K08995              | putative membrane protein                                                                                                                            |
| K07506              | AraC family transcriptional regulator                                                                                                                |
| K10778              | AraC family transcriptional regulator, regulatory protein of adaptative response / methylated-DNA-[protein]-cysteine methyltransferase [EC:2.1.1.63] |
| K07165              | transmembrane sensor                                                                                                                                 |
| K07161              | NA                                                                                                                                                   |
| K00830              | alanine-glyoxylate transaminase / serine-glyoxylate transaminase / serine-pyruvate transaminase [EC:2.6.1.44 2.6.1.45 2.6.1.51]                      |
| K01266              | D-aminopeptidase [EC:3.4.11.19]                                                                                                                      |
| K05559              | multicomponent K <sup>+</sup> :H <sup>+</sup> antiporter subunit A                                                                                   |
| K02278              | prepilin peptidase CpaA [EC:3.4.23.43]                                                                                                               |
| K02279              | pilus assembly protein CpaB                                                                                                                          |
| K02276              | cytochrome c oxidase subunit III [EC:1.9.3.1]                                                                                                        |
| K02274              | cytochrome c oxidase subunit I [EC:1.9.3.1]                                                                                                          |
| K02275              | cytochrome c oxidase subunit II [EC:1.9.3.1]                                                                                                         |
| K02305              | nitric oxide reductase subunit C                                                                                                                     |
| K13924              | two-component system, chemotaxis family, CheB/CheR fusion protein [EC:2.1.1.80 3.1.1.61]                                                             |
| K13926              | ribosome-dependent ATPase                                                                                                                            |
| K09924              | hypothetical protein                                                                                                                                 |
| K10764              | O-succinylhomoserine sulfhydrylase [EC:2.5.1.-]                                                                                                      |
| K07157              | NA                                                                                                                                                   |



|        |                                                                      |
|--------|----------------------------------------------------------------------|
| K03188 | urease accessory protein                                             |
| K01067 | acetyl-CoA hydrolase [EC:3.1.2.1]                                    |
| K01797 | NA                                                                   |
| K00824 | D-alanine transaminase [EC:2.6.1.21]                                 |
| K00685 | arginine-tRNA-protein transferase [EC:2.3.2.8]                       |
| K09796 | hypothetical protein                                                 |
| K11177 | xanthine dehydrogenase YagR molybdenum-binding subunit [EC:1.17.1.4] |
| K11178 | xanthine dehydrogenase YagS FAD-binding subunit [EC:1.17.1.4]        |
| K00329 | NADH dehydrogenase [EC:1.6.5.3]                                      |
| K09008 | hypothetical protein                                                 |
| K09005 | hypothetical protein                                                 |
| K05563 | multicomponent K <sup>+</sup> :H <sup>+</sup> antiporter subunit F   |
| K01800 | maleylacetoacetate isomerase [EC:5.2.1.2]                            |
| K00253 | isovaleryl-CoA dehydrogenase [EC:1.3.8.4]                            |
| K02258 | cytochrome c oxidase assembly protein subunit 11                     |
| K11962 | urea transport system ATP-binding protein                            |
| K11963 | urea transport system ATP-binding protein                            |
| K11960 | urea transport system permease protein                               |
| K11961 | urea transport system permease protein                               |
| K05973 | poly(3-hydroxybutyrate) depolymerase [EC:3.1.1.75]                   |
| K07102 | NA                                                                   |
| K00023 | acetoacetyl-CoA reductase [EC:1.1.1.36]                              |
| K15866 | 2-(1,2-epoxy-1,2-dihydrophenyl)acetyl-CoA isomerase [EC:5.3.3.18]    |
| K04561 | nitric oxide reductase subunit B [EC:1.7.2.5]                        |
| K05564 | multicomponent K <sup>+</sup> :H <sup>+</sup> antiporter subunit G   |
| K05562 | multicomponent K <sup>+</sup> :H <sup>+</sup> antiporter subunit E   |
| K05561 | multicomponent K <sup>+</sup> :H <sup>+</sup> antiporter subunit D   |
| K05560 | multicomponent K <sup>+</sup> :H <sup>+</sup> antiporter subunit C   |
| K02533 | tRNA/rRNA methyltransferase [EC:2.1.1.-]                             |
| K15011 | two-component system, sensor histidine kinase RegB [EC:2.7.13.3]     |
| K03200 | type IV secretion system protein VirB5                               |
| K07303 | isoquinoline 1-oxidoreductase, beta subunit [EC:1.3.99.16]           |
| K07302 | isoquinoline 1-oxidoreductase, alpha subunit [EC:1.3.99.16]          |
| K07234 | uncharacterized protein involved in response to NO                   |
| K00303 | sarcosine oxidase, subunit beta [EC:1.5.3.1]                         |
| K02651 | pilus assembly protein FliP/PilA                                     |
| K01055 | 3-oxoadipate enol-lactonase [EC:3.1.1.24]                            |
| K02502 | ATP phosphoribosyltransferase regulatory subunit                     |
| K03325 | arsenite transporter, ACR3 family                                    |
| K02225 | cobalamin biosynthetic protein CobC                                  |
| K01991 | polysaccharide export outer membrane protein                         |

|        |                                                                                               |
|--------|-----------------------------------------------------------------------------------------------|
| K04748 | nitric oxide reductase NorQ protein                                                           |
| K00304 | sarcosine oxidase, subunit delta [EC:1.5.3.1]                                                 |
| K00305 | sarcosine oxidase, subunit gamma [EC:1.5.3.1]                                                 |
| K01429 | urease subunit beta [EC:3.5.1.5]                                                              |
| K05343 | maltose alpha-D-glucosyltransferase/ alpha-amylase [EC:5.4.99.16 3.2.1.1]                     |
| K06044 | (1->4)-alpha-D-glucan 1-alpha-D-glucosylmutase [EC:5.4.99.15]                                 |
| K13766 | methylglutaconyl-CoA hydratase [EC:4.2.1.18]                                                  |
| K01430 | urease subunit gamma [EC:3.5.1.5]                                                             |
| K11959 | urea transport system substrate-binding protein                                               |
| K15012 | two-component system, response regulator RegA                                                 |
| K00457 | 4-hydroxyphenylpyruvate dioxygenase [EC:1.13.11.27]                                           |
| K00104 | glycolate oxidase [EC:1.1.3.15]                                                               |
| K04756 | alkyl hydroperoxide reductase subunit D                                                       |
| K03519 | carbon-monoxide dehydrogenase medium subunit [EC:1.2.99.2]                                    |
| K09983 | hypothetical protein                                                                          |
| K06995 | NA                                                                                            |
| K00119 | NA                                                                                            |
| K00449 | protocatechuate 3,4-dioxygenase, beta subunit [EC:1.13.11.3]                                  |
| K00114 | alcohol dehydrogenase (cytochrome c) [EC:1.1.2.8]                                             |
| K05524 | ferredoxin                                                                                    |
| K02282 | pilus assembly protein CpaE                                                                   |
| K02280 | pilus assembly protein CpaC                                                                   |
| K03153 | glycine oxidase [EC:1.4.3.19]                                                                 |
| K09959 | hypothetical protein                                                                          |
| K00050 | hydroxypyruvate reductase [EC:1.1.1.81]                                                       |
| K08738 | cytochrome c                                                                                  |
| K07018 | NA                                                                                            |
| K00126 | formate dehydrogenase, delta subunit [EC:1.2.1.2]                                             |
| K14161 | protein ImuB                                                                                  |
| K11902 | type VI secretion system protein ImpA                                                         |
| K07246 | tartrate dehydrogenase/decarboxylase / D-malate dehydrogenase [EC:1.1.1.93 4.1.1.73 1.1.1.83] |
| K03198 | type IV secretion system protein VirB3                                                        |
| K11472 | glycolate oxidase FAD binding subunit                                                         |
| K11473 | glycolate oxidase iron-sulfur subunit                                                         |
| K11475 | GntR family transcriptional regulator, vanillate catabolism transcriptional regulator         |
| K07649 | two-component system, OmpR family, sensor histidine kinase TctE [EC:2.7.13.3]                 |
| K07395 | putative proteasome-type protease                                                             |
| K07028 | NA                                                                                            |
| K02391 | flagellar basal-body rod protein FlgF                                                         |
| K01601 | ribulose-bisphosphate carboxylase large chain [EC:4.1.1.39]                                   |
| K03821 | polyhydroxyalkanoate synthase [EC:2.3.1.-]                                                    |

|        |                                                                                                          |
|--------|----------------------------------------------------------------------------------------------------------|
| K07168 | CBS domain-containing membrane protein                                                                   |
| K06923 | NA                                                                                                       |
| K00411 | ubiquinol-cytochrome c reductase iron-sulfur subunit [EC:1.10.2.2]                                       |
| K01941 | urea carboxylase [EC:6.3.4.6]                                                                            |
| K17226 | sulfur-oxidizing protein SoxY                                                                            |
| K11897 | type VI secretion system protein ImpF                                                                    |
| K10125 | two-component system, NtrC family, C4-dicarboxylate transport sensor histidine kinase DctB [EC:2.7.13.3] |
| K10126 | two-component system, NtrC family, C4-dicarboxylate transport response regulator DctD                    |
| K04090 | indolepyruvate ferredoxin oxidoreductase [EC:1.2.7.8]                                                    |

1  
2

1 **Table S2.** Enrichment analysis of genes influencing the gain of *rbsS*.

| Annotation label                     | p-value <sup>1</sup> | test set <sup>2</sup> | background set <sup>3</sup> | Enrichment <sup>4</sup> |
|--------------------------------------|----------------------|-----------------------|-----------------------------|-------------------------|
| Nitric oxide reductase (Nor) complex | 6.73E-05             | 4                     | 5                           | 12.83018868             |
| Urea transport system (Urt)          | 8.62E-07             | 5                     | 5                           | 16.03773585             |
| Purine degradation, xanthine=>urea   | 0.00042              | 4                     | 7                           | 9.164420485             |
| Photorespiration                     | 8.49E-05             | 5                     | 9                           | 8.909853249             |
| Type IV secretion system             | 0.0031               | 4                     | 11                          | 5.831903945             |

2 1: from a hypergeometric test.

3 2: the number of genes with this annotation appearing in Table S1 (out of 129 genes).

4 3: the number of genes with this annotation appearing in the set of all genes in the PGCE network (out of 2472 genes).

5 4: The ratio of the observed proportion of genes with this label to the expected proportion.

6 5: The annotation of these genes to the same pathway is not present in KEGG, so this enrichment is derived from  
7 our manual annotation.  
89  
10

1 **Table S3.** Summary of nodes (genes) ranked by their order in a topological sort.

| Rank | Number of genes | Total out-degree | Total in-degree |
|------|-----------------|------------------|-----------------|
| 1    | 1593            | 7792             | 0               |
| 2    | 498             | 357              | 2512            |
| 3    | 118             | 73               | 2348            |
| 4    | 46              | 6                | 2992            |
| 5    | 5               | 0                | 376             |

2

3

1 **Table S4.** Characteristics of PGCE network models inferred from data subsets.

| Dataset <sup>1</sup>                     | # PGCEs | ROC AUC <sup>2</sup> | Predictable / Total <sup>3</sup> |
|------------------------------------------|---------|----------------------|----------------------------------|
| All (predicting Firmicutes) <sup>c</sup> | 8,228   | 0.80                 | 667 / 3281                       |
| Lacking Firmicutes                       | 3,703   | 0.73                 | 394 / 3281                       |
| Lacking A/B-proteobacteria               | 1,726   | 0.68                 | 204 / 3505                       |

2 1: The dataset used to train the PGCE model in question. Predictions are made concerning the test set (dataset  
3 lacking Firmicutes predicts Firmicutes).

4 2: Area under the curve of the receiver operating characteristic curve; a random prediction is 0.5, a perfect  
5 prediction is 1.0.

6 3: The number of genes that are predictable using each dataset to train PGCE models, compared to the total number  
7 of genes that are actually gained at least once (defined as  $\text{Pr}(\text{gain}) > 0.5$ ) in the test set clade.  
8

## 1 Supporting References

- 2 Baltrus DA. 2013. Exploring the costs of horizontal gene transfer. *Trends Ecol Evol* **28**: 489–95.
- 3 Cohen O, Ashkenazy H, Burstein D, Pupko T. 2012. Uncovering the co-evolutionary network among prokaryotic  
4 genes. *Bioinformatics* **28**: i389–i394.
- 5 Cohen O, Gophna U, Pupko T. 2011. The complexity hypothesis revisited: connectivity rather than function  
6 constitutes a barrier to horizontal gene transfer. *Mol Biol Evol* **28**: 1481–9.
- 7 Cohen O, Pupko T. 2010. Inference and characterization of horizontally transferred gene families using stochastic  
8 mapping. *Mol Biol Evol* **27**: 703–13.
- 9 Hassin R, Rubinstein S. 1994. Approximations for the maximum acyclic subgraph problem. *Inf Process Lett* **51**:  
10 133–140.
- 11 Hausmann D, Korte B. 1978. K-greedy algorithms for independence systems. *Zeitschrift für Oper Res* **22**: 219–228.
- 12 Hsu HT. 1975. An Algorithm for Finding a Minimal Equivalent Graph of a Digraph. *J ACM* **22**: 11–16.
- 13 Knuth DE. 1973. *The Art of Computer Programming, Vol. 1: Fundamental Algorithms*. Addison-Wesley, Reading,  
14 Mass.
- 15 Maddison WP. 1990. A Method for Testing the Correlated Evolution of Two Binary Characters: Are Gains or  
16 Losses Concentrated on Certain Branches of a Phylogenetic Tree? *Evolution (N Y)* **44**: 539–557.
- 17 Minin VN, Suchard MA. 2008. Counting labeled transitions in continuous-time Markov models of evolution. *J*  
18 *Math Biol* **56**: 391–412.
- 19
